# Supplementary material
Source: PubMed Central journal article supplement (PMC2747227)
Supplement: 0901477106_0901477106SI.pdf [file 0901477106_0901477106SI.pdf]

# Supporting Information

Kershaw and Talbot 10.1073/pnas.0901477106

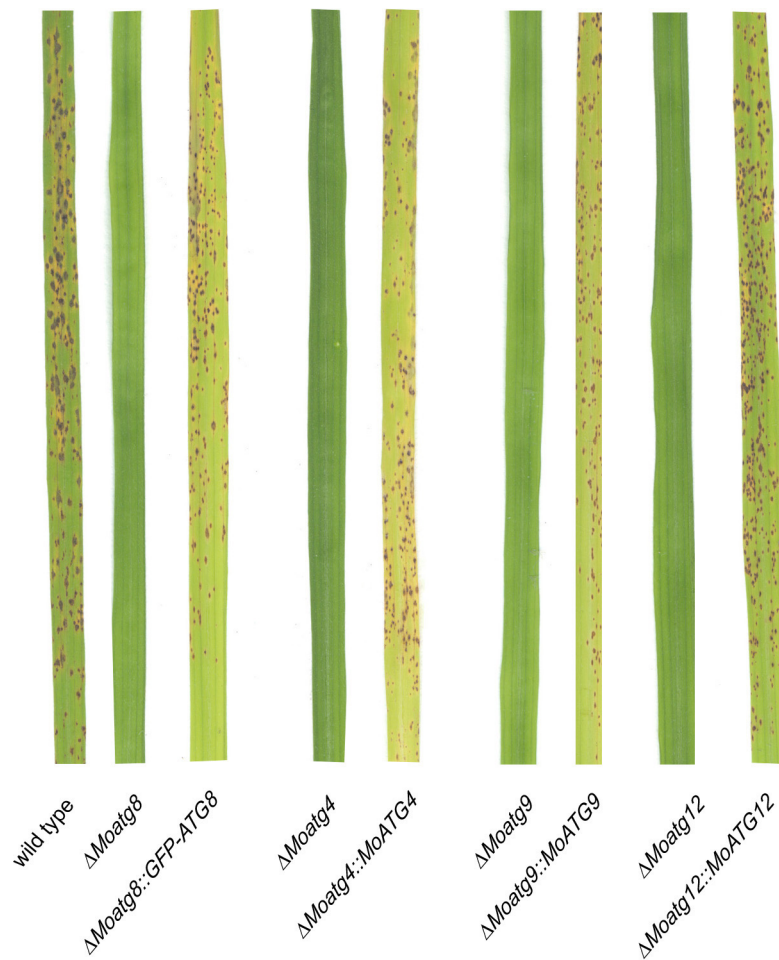

**Fig. S1.** Complementation of autophagy mutants. Seedlings of rice cultivar CO-39 were inoculated with uniform conidial suspensions harvested from Guy-11 (wt), from  $\Delta Moatg4$ ,  $\Delta Moatg9$ ,  $\Delta Moatg8$ , and  $\Delta Moatg12$  deletion mutants and from autophagy deletion mutants which had been complemented with the native genes  $\Delta Moatg4$ ,  $\Delta Moatg9$ , and  $\Delta Moatg12$  or the construct  $\Delta Moatg8-gfp$ . Seedlings were incubated for 5 days to allow development of disease symptoms. To construct the vectors for complementation, the full length genomic copies of *ATG4*, *ATG9*, and *ATG12* were amplified using primers Atg4prom with *ATG4* RF3', which generated an amplicon of 4.2 kb, *ATG9*prom with *ATG9* RF3', which generated an amplicon of 5.4 kb and *ATG12*prom with *Atg12* RF3', which generated an amplicon of 3.5 kb (see Table S1). The primers were designed to include 1.5 kb upstream of the start codon and 1 kb 3' UTR. The amplicons were cloned into strataclone (Stratagene) to generate pAtg4st, pAtg9st, and pAtg12st. The *ATG4* amplicon was excised from pAtg4st by digestion with KpnI-NotI and cloned into pCB1530, which carries a selectable marker conferring resistance to Basta, to generate pAtg4com. The *ATG12* amplicon was excised from pAtg12st by digesting with SacI-XbaI and cloned into pCB1530 to generate pAtg12com. The *ATG9* complementation vector was generated by amplifying the *Bar* gene from pCB1530 as a SpeI fragment which was then ligated into pAtg9st to generate pAtg9com. The resulting vectors pAtg4com, pAtg9com and pATG12com were transformed into the *M. oryzae* mutant strains  $\Delta Moatg4$ ,  $\Delta Moatg9$ , and  $\Delta Moatg12$ . Transformants were selected in the presence of Basta (50  $\mu$ g mL<sup>-1</sup>).

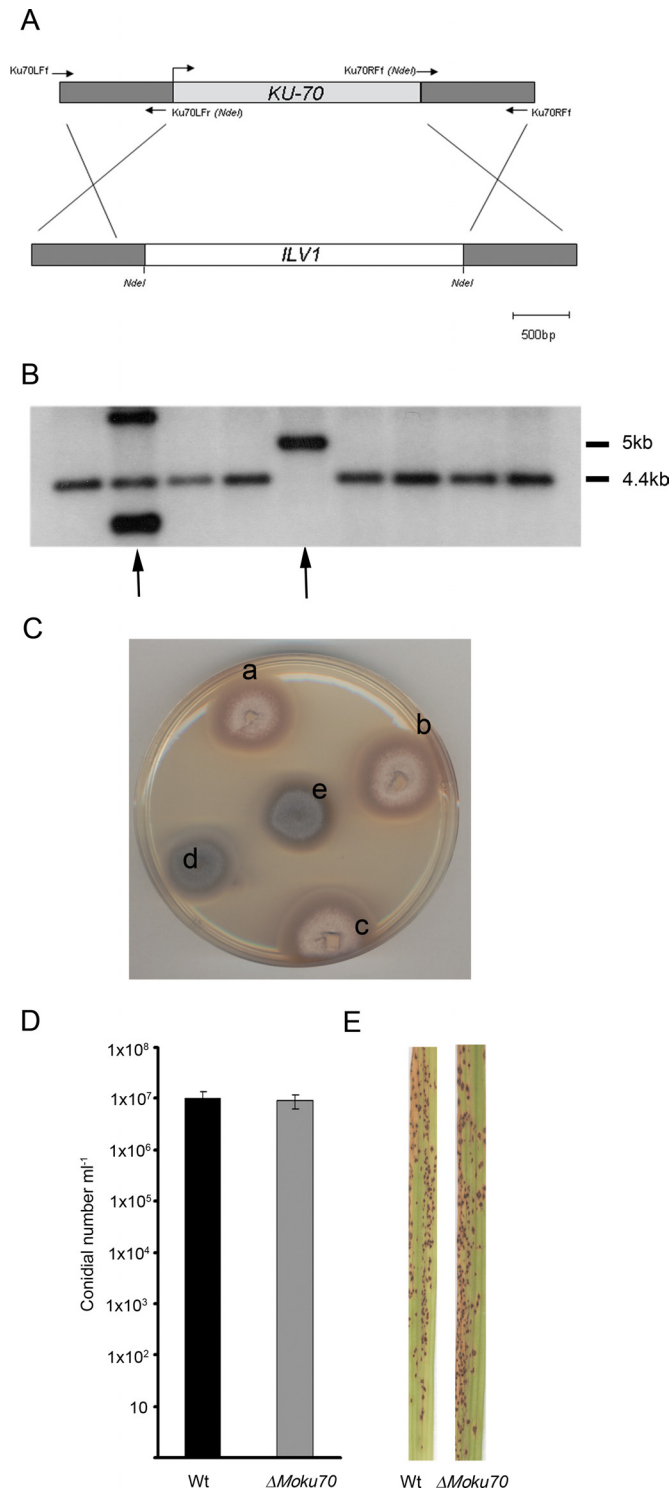

**Fig. S2.** Targeted gene disruption of the *M. oryzae* *KU-70* gene. (A) A 2.8 kb *NdeI* fragment containing the *ILV1* resistance cassette was introduced into a vector containing two 1 kb regions flanking the *KU-70* ORF to create pMJG1. (B) The resulting 4.8 kb fragment was introduced into *M. oryzae* Guy-11 and deletion mutants identified. Southern blot analysis was carried out. Arrows indicate one ectopic integrant (lane 2) and one deletion mutant (lane 5). (C) A deletion cassette for the *M. oryzae* *BUF1* gene was used to transform a  $\Delta ku70$  deletion mutant. The results indicated a 80% rate of homologous integration. Transformants (a–c) show melanin deficient phenotype associated with  $\Delta buf1$ , (d) is an ectopic transformant and (e) Guy-11. (D) Bar graph of numbers of conidia produced from cultures of wild type (Guy-11) and the  $\Delta Moku70$  mutant. Conidia were collected by flooding plate cultures and gently scraping aerial mycelium with a glass rod. Suspensions were filtered to remove mycelial debris and counted. (E) Seedlings of rice cultivar CO-39 were inoculated with uniform conidial suspensions of Guy-11 and  $\Delta Moku70$ . Seedlings were incubated for 5 days to allow development of disease symptoms.

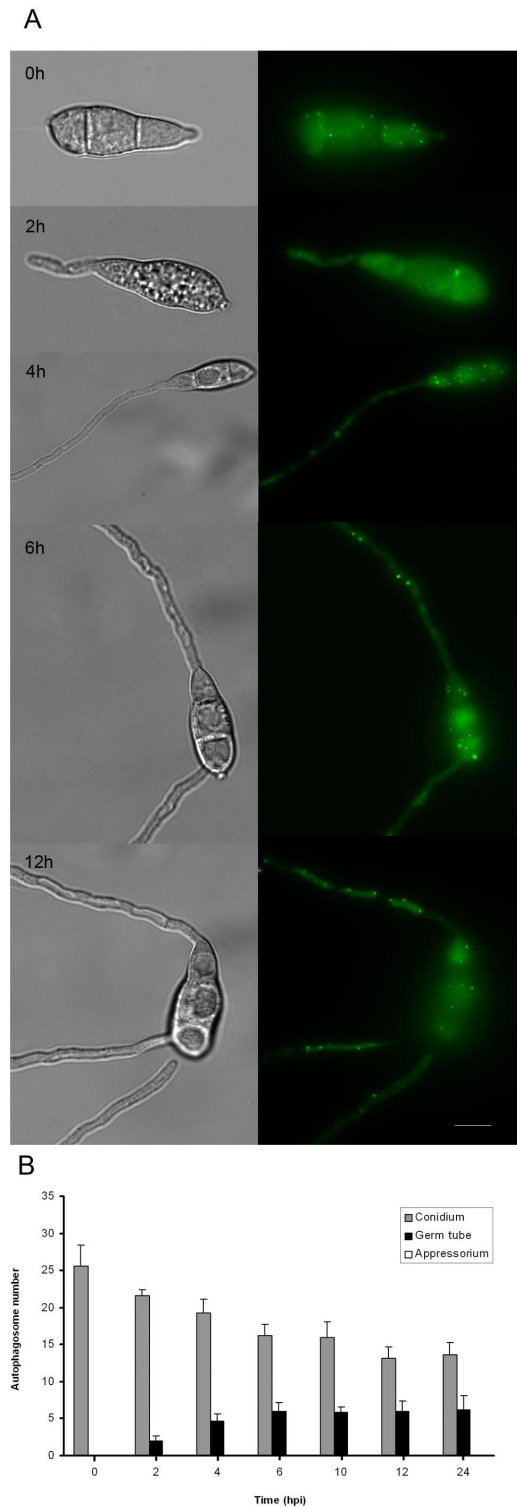

**Fig. S3.** Cellular localization of autophagosomes during infection-related development of a  $\Delta pmk1$  mutant of *M. oryzae*. (A) Conidia were harvested from a  $\Delta pmk1$  transformant expressing a *GFP:MoATG8* gene fusion, inoculated onto glass coverslips and observed by epifluorescence microscopy at the times indicated (Scale bars, 10  $\mu$ m.). (B) Bar chart showing mean autophagosome numbers present in conidium and germ tubes 0 h, 2 h, 4 h, 6 h, 10 h and 12 h after inoculation with  $\Delta pmk1$  mutant expressing a *GFP:MoATG8* (error bars indicate  $\pm 2$  SE). The  $\Delta pmk1$  mutants are unable to elaborate an appressorium (1).

1. Sweigard J, Chumley F, Carroll A, Farrall L, Valent B (1997) A series of vectors for fungal transformation. *Fungal Genet Newsl* 44:52–53.

# Split marker gene deletion method

## 1st round PCR

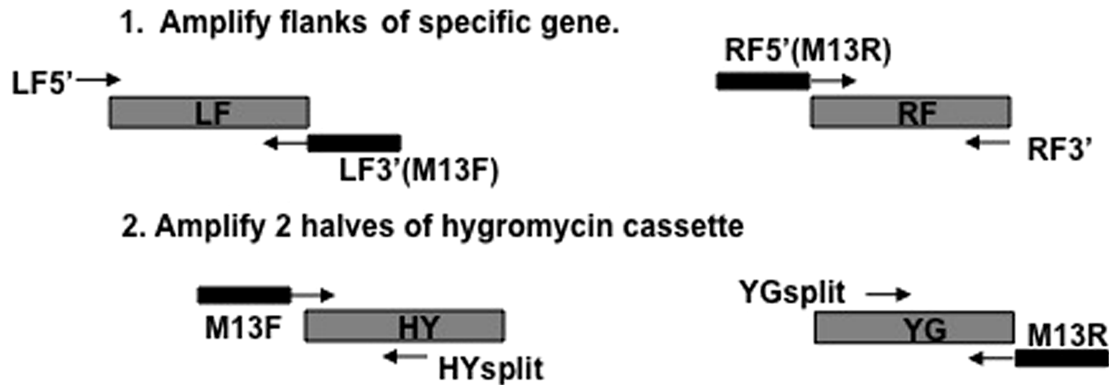

## 2nd round PCR

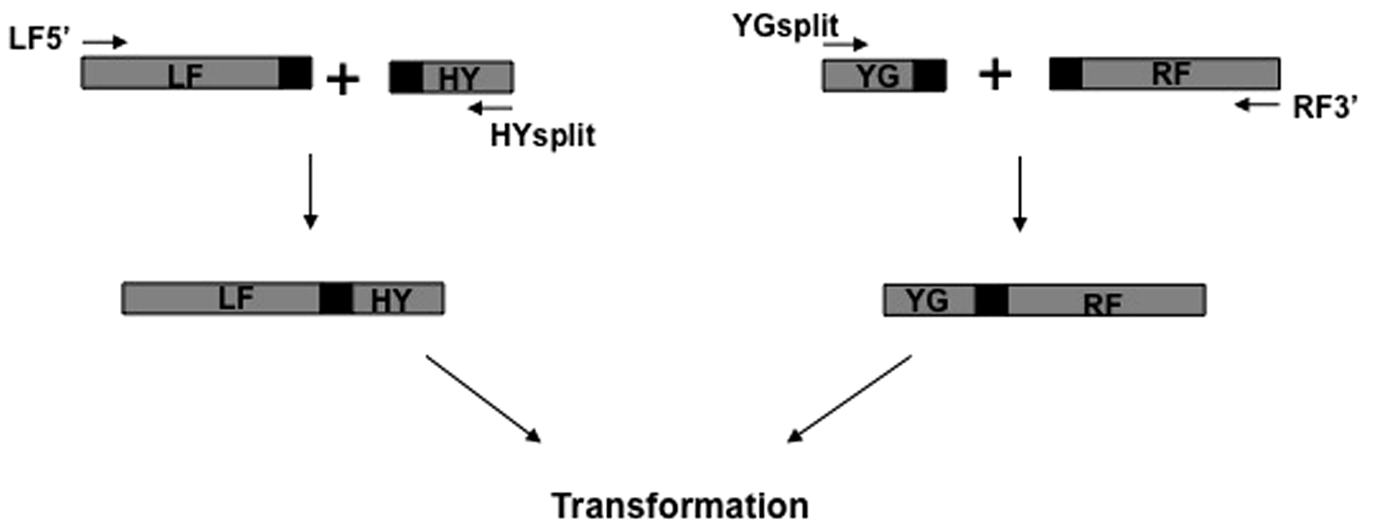

**Fig. S4.** Schematic representation of the split marker method used to generate the autophagy gene deletion set. The method is described in ref. 2 and the figure can be used as a key to the primers given in Table S3. A first round of PCR is used to amplify flanking sequences on either side of the gene of interest. At the same time overlapping fragments of the 5' and 3' end of the hygromycin resistance cassette are amplified. A fusion PCR results in 2 amplicons that are used to transform *M. oryzae*, resulting in homologous recombination and assembly of the selectable marker gene (2).

1. Catlett NL, Lee B-N, Yoder OC, Turgeon BG (2003) Split-marker recombination for efficient targeted deletion of fungal genes. *Fungal Genetics Newsletter* 50:9–11.

Table S1. Autophagy genes identified in *M. oryzae*

| Yeast Gene* | Function ( <i>Saccharomyces cerevisiae</i> )                                                                                                                                                                                                     | <i>M. oryzae</i> hits† |
|-------------|--------------------------------------------------------------------------------------------------------------------------------------------------------------------------------------------------------------------------------------------------|------------------------|
| ATG1        | Protein serine/threonine kinase, required for autophagy and for the cytoplasm-to-vacuole targeting (Cvt) pathway                                                                                                                                 | MGG_06393              |
| ATG2        | Peripheral membrane protein required for the formation of cytosolic sequestering vesicles involved in vacuolar import through both the Cvt pathway and autophagy; interacts with Atg9p and is necessary for its trafficking                      | MGG_05998              |
| ATG3        | Protein involved in autophagy; E2-like enzyme that plays a role in formation of Atg8p-phosphatidylethanolamine conjugates, which are involved in membrane dynamics during autophagy                                                              | MGG_02959              |
| ATG4        | Cysteine protease required for autophagy; cleaves Atg8p to a form required for autophagosome and Cvt vesicle generation; mediates attachment of autophagosomes to microtubules through interactions with Tub1p and Tub2p                         | MGG_03580              |
| ATG5        | Conserved autophagy-related protein that undergoes conjugation with Atg12p and then associates with Atg16p to form a cytosolic complex essential for autophagosome formation                                                                     | MGG_09262              |
| ATG6        | Protein that forms a membrane-associated complex with Apg14p that is essential for autophagy; involved in a retrieval step of the carboxypeptidase Y receptor, Vps10p, to the late Golgi from the endosome; involved in vacuolar protein sorting | MGG_03694              |
| ATG7        | Autophagy-related protein and dual specificity member of the E1 family of ubiquitin-activating enzymes; mediates the conjugation of Atg12p with Atg5p and Atg8p with phosphatidylethanolamine, required steps in autophagosome formation         | MGG_07297              |
| ATG8        | Protein required for autophagy; modified by the serial action of Atg4p, Atg7p, and Atg3p, and conjugated at the C terminus with phosphatidylethanolamine, to become the form essential for generation of autophagosomes                          | MGG_01062.5            |
| ATG9        | Transmembrane protein involved in formation of Cvt and autophagic vesicles; cycles between the pre-autophagosomal structure and other cytosolic punctate structures, not found in autophagosomes                                                 | MGG_09559.5            |
| ATG10       | E2-like conjugating enzyme that mediates formation of the Atg12p-Atg5p conjugate, which is a critical step in autophagy                                                                                                                          | MGG_14737              |
| ATG11       | Peripheral membrane protein required for delivery of aminopeptidase I (Lap4p) to the vacuole in the cytoplasm-to-vacuole targeting pathway; also required for peroxisomal degradation (pexophagy)                                                | MGG_04486              |
| ATG12       | Ubiquitin-like modifier, conjugated via an isopeptide bond to a lysine residue of Atg5p by the E1 enzyme, Atg7p, and the E2 enzyme, Atg10p, a step that is essential for autophagy                                                               | MGG_00598              |
| ATG13       | Phosphorylated protein that interacts with Vac8p, required for the cytoplasm-to-vacuole targeting (Cvt) pathway and autophagy                                                                                                                    | MGG_00454              |
| ATG14       | Subunit of an autophagy-specific phosphatidylinositol 3-kinase complex (with Vps34p, Vps15p, and Vps30p) required for organization of a pre-autophagosomal structure; ATG14 transcription is activated by Gln3p during nitrogen starvation       | None                   |
| ATG15       | Lipase, required for intravacuolar lysis of autophagic bodies; located in the endoplasmic reticulum membrane and targeted to intravacuolar vesicles during autophagy via the multivesicular body (MVB) pathway                                   | MGG_12828              |
| ATG16       | Protein that interacts with the Atg12p-Atg5p conjugate during formation of the pre-autophagosomal structure; essential for autophagy                                                                                                             | MGG_05255              |
| ATG17       | Scaffold protein responsible for pre-autophagosomal structure organization; interacts with and is required for activation of Apg1p protein kinase; involved in autophagy but not in the Cvt (cytoplasm to vacuole targeting) path                | MGG_07667              |
| ATG18       | Phosphatidylinositol 3,5-bisphosphate-binding protein of the vacuolar membrane, predicted to fold as a seven-bladed beta-propeller; required for recycling of Atg9p through the pre-autophagosomal structure                                     | MGG_03139              |
| ATG19       | Protein involved in the cytoplasm-to-vacuole targeting pathway and in autophagy, recognizes cargo proteins and delivers them to the preautophagosomal structure for eventual engulfment by the autophagosome and degradation                     | None                   |
| ATG20       | Protein required for transport of aminopeptidase I (Lap4p) through the cytoplasm-to-vacuole targeting pathway; binds phosphatidylinositol-3-phosphate, involved in localization of membranes to the preautophagosome, potential Cdc28p substrate | None                   |
| ATG21       | Phosphatidylinositol 3,5-bisphosphate-binding protein required for maturation of pro-aminopeptidase I, predicted to fold as a seven-bladed beta-propeller; displays punctate cytoplasmic localization                                            | None                   |
| ATG22       | Protein required for the breakdown of autophagic vesicles in the vacuole during autophagy, putative integral membrane protein that localizes to vacuolar membranes and punctate structures attached to the vacuole                               | MGG_09904              |
| ATG23       | Peripheral membrane protein, required for autophagy and for the cytoplasm-to-vacuole targeting (Cvt) pathway                                                                                                                                     | None                   |

| Yeast Gene* | Function ( <i>Saccharomyces cerevisiae</i> )                                                                                                                                                                            | <i>M. oryzae</i> hits† |
|-------------|-------------------------------------------------------------------------------------------------------------------------------------------------------------------------------------------------------------------------|------------------------|
| ATG24       | Sorting nexin, involved in the retrieval of late-Golgi SNAREs from the post-Golgi endosome to the trans-Golgi network and in cytoplasm to vacuole transport; contains a PX domain; forms complex with Snx41p and Atg20p | MGG_03638              |
| ATG26       | UDP-glucose:sterol glucosyltransferase, conserved enzyme involved in synthesis of sterol glucoside membrane lipids, involved in autophagy                                                                               | MGG_03459              |
| ATG27       | Type II membrane protein involved in autophagy; binds phosphatidylinositol 3-phosphate, required for the cytoplasm-to-vacuole targeting (Cvt) pathway                                                                   | MGG_02386              |
| ATG28       | Involved in degradation of peroxisomes                                                                                                                                                                                  | MGG_08061              |
| ATG29       | Protein specifically required for autophagy; may function in autophagosome formation at the pre-autophagosomal structure in collaboration with other autophagy proteins                                                 | MGG_02790              |
| ATG31       | May form a complex with Atg17p and Atg29p that localizes other proteins to the pre-autophagosomal structure                                                                                                             | None                   |

\*Source of information; <http://yeastgenome.org/>.

†Identified as best bidirectional Blast hits at  $< 1e-5$ .

**Table S2. Sub-type-specific autophagy genes in *M. oryzae***

| Gene Name |     | Involvement in autophagy |             | ( <i>S.cerevisiae</i> ) | <i>M.oryzae</i> homologues |
|-----------|-----|--------------------------|-------------|-------------------------|----------------------------|
|           |     |                          | Cvt pathway | Pexophagy               | Non-selective autophagy    |
| ATG11     | Yes |                          | Yes         | No                      | MGG_04486                  |
| ATG17     | No  |                          | No          | Yes                     | MGG_05255                  |
| ATG19     | Yes |                          | No          | No                      | None                       |
| ATG20     | Yes |                          | No          | No                      | None                       |
| ATG21     | Yes |                          | Yes         | No                      | None                       |
| ATG23     | Yes |                          | No          | —                       | None                       |
| ATG24     | Yes |                          | Yes         | No                      | MGG_03638                  |
| ATG26     | No  |                          | Yes         | No                      | MGG_03459                  |
| ATG27     | —   |                          | No          | No                      | MGG_02386                  |
| ATG28     | —   |                          | Yes         | No                      | MGG_08061                  |
| ATG29     | No  |                          |             | Yes                     | MGG_02790                  |

Table S3. Primers used to make gene deletions of *M. oryzae* autophagy loci

| Gene  | Primers                                                                                                                                                                                                        |
|-------|----------------------------------------------------------------------------------------------------------------------------------------------------------------------------------------------------------------|
| ATG1  | LF5' TCTCAGTTCAGTCCAAGGCAAGGT<br>LF3' GTCGTGACTGGGAAAACCTGGCGGTGCTGATCGGTCCGCCATAATTC<br>RF5' AGGTTTTTGGAGTACGGGGAGGTT<br>RF3' TCCTGTGTGAAATTGTTATCCGCTACAGTTCACGATAAGCACCCAGCA                                |
| ATG2  | LF5' gatggactgctacaccacacc<br>LF3' GTCGTGACTGGGAAAACCTGGCGGGGCTCGCGAGTGTGTTGCTAAGC<br>RF5' gatagctccaagcagctcttga<br>RF3' TCCTGTGTGAAATTGTTATCCGCTAAGATAATCTGGGGGACAGTGAGG                                     |
| ATG3  | LF5' gctgccgaggaggatgacgac<br>LF3' gctgtgactgggaaaacctggcgctacgaactcctctgtgtgat<br>RF5' gctgccgaggaggatgacgac<br>RF3' tcctgtgtgaaattgtatccgctcgtacgaactcctctgtgtgat                                            |
| ATG4  | LF5' tcaacaacgcagacagacacctca<br>LF3' gctgtgactgggaaaacctggcgacggcatttggggcaccttgtttg<br>RF5' gcaaagaaggacgaccgccaagt<br>RF3' tcctgtgtgaaattgtatccgctcagggaagtcattcattacagt                                    |
| ATG5  | LF5' acagcaaagtgagaaggggggatg<br>LF3' gctgtgactgggaaaacctggcg cgcgacgtgattcttgatagtg<br>RF5' ttactctctcatcctcatcagcc<br>RF3' tcctgtgtgaaattgtatccgct gctttgttaacctagtgccatt                                    |
| ATG6  | LF5' catcctcgtcatcaccatcttc<br>LF3' GTCGTGACTGGGAAAACCTGGCGTtgcaaacatcatcgacacggc<br>RF5' AGCTAGGCATGTTTCATGGTCC<br>RF3' TCCTGTGTGAAATTGTTATCCGCTgacatagctcgcagctggtgggtg                                      |
| ATG7  | LF5' tgtgtccgtgaactttgggtatgt<br>LF3' gctgtgactgggaaaacctggcgctctatctgtgactcgaatggcgca<br>RF5' cccaaaacatcatgtacggcgtgc<br>RF3' tcctgtgtgaaattgtatccgct TAGGCATAGTTCCTCACCAGGTCC                               |
| ATG9  | LF5' cttacacttcagttccaccgacag<br>LF3' gctgtgactgggaaaacctggcggtcggttcaaattctcctcgtcg<br>RF5' acgagcccagatattgattgacag<br>RF3' tcctgtgtgaaattgtatccgctgacatagatgaaagtggagggtgcg                                 |
| ATG10 | LF5' ATCAACAACCTACCCGCTCCATGCG<br>LF3' GTCGTGACTGGGAAAACCTGGCGTCAGCGGTGAGAAATGGATAGCTC<br>RF5' GCGAAGGAGACAAAATGGCGACAG<br>RF3' TCCTGTGTGAAATTGTTATCCGCTCTGCTCCAAAGAAGACTACCTGAT                               |
| ATG11 | LF5' tctagcatcatatcgacacacga<br>LF3' gctgtgactgggaaaacctggcgctcggcaggtctatctccagcttga<br>RF5' atgagcttttccctgtaaccgcg<br>LF5' tcctgtgtgaaattgtatccgctaaccaaggagaagagtgcagatgc<br>RF3' acctgaaagtactgcaatagcggc |
| ATG12 | LF3' gctgtgactgggaaaacctggcgctggtgagacgacattgtgaaag<br>RF5' tgttgacgagctgttctgact<br>RF3' tcctgtgtgaaattgtatccgct ctactccatgactcctgcctttg                                                                      |
| ATG13 | LF5' CTGTTACCGCTGTGCTTGCTGCTT<br>LF3' GTCGTGACTGGGAAAACCTGGCGGAGGATAGCGGGACTGTTGATG<br>RF5' GTCGTGACTGGGAAAACCTGGCG<br>RF3' TCCTGTGTGAAATTGTTATCCGCTAAGATTCGGGGTGGTCTGTTATGAA                                  |
| ATG15 | LF5' TGGCTCGTTCAACCTGTTCTGCCC<br>LF3' GTCGTGACTGGGAAAACCTGGCGTAACGGTTTTCTCGCGCAATGAC<br>RF5' GCTGAAGCCCTCGTCTCATCCGC<br>RF3' TCCTGTGTGAAATTGTTATCCGCTGTGAGAAGGGTATGGGTGAGTTAT                                  |
| ATG16 | LF5' gagcgagaactgggtaaagtctc<br>LF3' gctgtgactgggaaaacctggcggaagacattgggatcgtgattttg<br>RF5' taaatacaatctatgtctcagga<br>RF3' tcctgtgtgaaattgtatccgctgccaacaggatgaatcaaaact                                     |
| ATG17 | LF5' gttgacattgctgtcagtg<br>LF3' GTCGTGACTGGGAAAACCTGGCGGCTCGGCAATGCTCTCCTCAGTG<br>RF5' AGGAGAGTGCTGAGACCAAGGAG<br>RF3' TCCTGTGTGAAATTGTTATCCGCTgaggggtcacttgaagaacc                                           |
| ATG18 | LF5' tttgtgctcttacgccatgacc<br>LF3' GTCGTGACTGGGAAAACCTGGCGgatgaagtttagcgttgacgtgc<br>RF5' aacgaagcgaagcagaagaccaag<br>RF3' TCCTGTGTGAAATTGTTATCCGCTTGGAAACGATAACACGGGTTTCAG                                   |



| Gene          | Primers                                                                                                                                                                         |
|---------------|---------------------------------------------------------------------------------------------------------------------------------------------------------------------------------|
| <i>ATG22A</i> | LF5' TGACCACTATGACCTCCTACGAAT<br>LF3' GTCGTGACTGGGAAAACCCTGGCGAAGAATACGAGCGGAAAGACC<br>RF5' GATACTCTGCTGTCGCTCGGATGA<br>RF3' TCCTGTGTGAAATTGTTATCCGCTTCCCAAGCGATGACGACGATG      |
| <i>ATG22B</i> | LF5' CTCTCATCCGTCCTTCTGGCCCTG<br>LF3' GTCGTGACTGGGAAAACCCTGGCGGGGCGTTGTTACTGCTGACCATGA<br>RF5' GCATGAGCAGCTTGTGGCCTTGA<br>RF3' TCCTGTGTGAAATTGTTATCCGCTGACACGGACCAGGCAAAGATTGAC |
| <i>ATG24</i>  | LF5' atgatggcagtcggcgaattata<br>LF3' gtcgtgactgggaaaaccctggcggttgctgctgttccgattc<br>RF5' cctcaagcagtcacagtcggct<br>RF3' tcctgtgtgaaattggtatccgcttcacagggaggtgctccgattttg        |
| <i>ATG26</i>  | LF5' GCAAGATCCGCGTTATTGACAACG<br>LF3' GTCGTGACTGGGAAAACCCTGGCG TCAAAGCGGCTGCCTCGTCGTAAT<br>RF5' TTTTCTTGTGGGAAATGGGCGG<br>RF3' TCCTGTGTGAAATTGTTATCCGCTCCCTCGAACGAAGCCATGTTGTTT |
| <i>ATG27</i>  | LF5' GTGAAAGGTGGAGTCGGTGGTATT<br>LF3' GTCGTGACTGGGAAAACCCTGGCGCAGGAGCGAGAGGATCGTCTTTGG<br>RF5' AATATCACATGCTCGGTGGATGGG<br>RF3' TCCTGTGTGAAATTGTTATCCGCTTCTTCACCCAGCGTATTCTCTG  |
| <i>ATG28</i>  | LF5' TGCCCGTACCCTTTGCATTCAAC<br>LF3' GTCGTGACTGGGAAAACCCTGGCGTGGGGTTTTGGTCACGTAGCGGCG<br>RF5' CAGACACGATACGCCAATGAGCGA<br>RF3' TCCTGTGTGAAATTGTTATCCGCTCAAAGGGAGGAGAGCGATAATGAG |
| <i>ATG29</i>  | LF5' TGAATACCTGGTCTGCTGCTGCGA<br>LF3' GTCGTGACTGGGAAAACCCTGGCGCTCTTGGGAAAGGGAGACGGATG<br>RF5' CAACCTGCCACAGCATTCTTCCCC<br>RF3' TCCTGTGTGAAATTGTTATCCGCTCAACGGAGAAGAAGTAGGAGAAGC |

**Table S4. Sequences of primers used in this study**

| Primer name                                       | Sequence 5'-3'                    |
|---------------------------------------------------|-----------------------------------|
| <b>A. <u>KU70 deletion cassette</u></b>           |                                   |
| Ku70 Lff                                          | AGATCTTGTGCGAGCAGCTTGACACA        |
| Ku70LFr                                           | tacatatgGTGTTTGTGCGCACGATC        |
| Ku70 Rff                                          | ATCATATGTATCATCCCGTCTAAGAGACC     |
| Ku70Rfr                                           | TAGCGGCCGCCATCAGGTTTAATGCTCA      |
| SurF                                              | ATCATATGTCGACGTGCCAACGCCACAG      |
| SurR                                              | aTCATATGGTCGACGTGAGAGCATGCAAT     |
| <b>B. <u>Split Marker Hygromycin cassette</u></b> |                                   |
| M13F                                              | cgccagggtttcccagtcacgac           |
| M13R                                              | agcggataacaatttcacacagga          |
| HYsplit                                           | ggatgctccgctcgaagta               |
| YGsplit                                           | cgttgaagacctgcctgaa               |
| <b>C. <u>GFP-ATG8 Construct</u></b>               |                                   |
| ATG8 spe1                                         | gcactagtcaagccactgcacctgcaattca   |
| ATG8 nco1 rev                                     | gagcccatggcggcggttgattgag         |
| GFP cla1 rev                                      | gtgcatcgatctgtacagctcgtccatgccgag |
| ATG8 cla1                                         | gccatcgatcgctccaagttcaaggacgagcac |
| ATG8 xho1                                         | gcctcgagatgatgtgatgtctgcctcagct   |
| <b>D. <u>Complementation</u></b>                  |                                   |
| ATG4prom                                          | TCTAGATGGTACYGGGGGCTTGC           |
| ATG9prom                                          | GTGGGAACCTGGGACCTACATCGG          |
| ATG12prom                                         | GCCTGTCCACATCACCTCGAAGTA          |
